# Supplementary material
Source: PubMed Central journal article supplement (PMC6279506)
Supplement: NIHMS987594-supplement-1.pdf [file NIHMS987594-supplement-1.pdf]

Supporting Information. Cognitive-Behavioral Strategies

| <b>Category</b>                | <b>Strategy Description &amp; Length of Recording</b>                                                                                                                                             |
|--------------------------------|---------------------------------------------------------------------------------------------------------------------------------------------------------------------------------------------------|
| <i>Symptom Focused Imagery</i> | <i>Pain-Focused Imagery:</i> Instructions to create images of draining pain from the body and using a magical glove to replace or change remaining pain sensations (21:22)                        |
|                                | <i>Fatigue-Focused Imagery:</i> Instructions to create images of circulating a ball of revitalizing energy throughout the body (21:46)                                                            |
|                                | <i>Sleep-Focused Imagery:</i> Instructions to create images of erasing thoughts from the mind and floating into a deep sleep (18:20)                                                              |
| <i>Nature Focused Imagery</i>  | <i>Beach Imagery:</i> Instructions to create images of a calm blue ocean beach, walking in the sand, and resting on a beach blanket (24:32)                                                       |
|                                | <i>Mountain Imagery:</i> Instructions to create images of walking a trail through a pine forest and reaching a scenic overlook of a river running through a mountain valley (20:24)               |
|                                | <i>Meadow Imagery:</i> Instructions to create images of walking a path through a grassy meadow, sitting on a bench in a field of wildflowers, and approaching a small bridge over a creek (19:53) |
| <i>Relaxation Exercises</i>    | <i>Progressive Muscle Relaxation:</i> Instructions to tense and relax groups of muscles throughout the body, from hands to head to toes, noticing the sensations of relaxation (20:45)            |
|                                | <i>Jaw Relaxation:</i> Instructions to relax muscles of the mouth, throat, face, and abdomen, stimulating a yawn and release of muscle tension (5:03)                                             |
|                                | <i>Rhythmic Breathing:</i> Instructions to practice slow deep breathing, relax muscles, and repeat a calming word or phrase (7:39)                                                                |
| <i>Nature Sounds</i>           | <i>Rain storm:</i> Sounds of a steady gentle rain and distant thunder (23:01)                                                                                                                     |
|                                | <i>Surf and waves:</i> Sounds of wind, birds, and waves rhythmically washing ashore (24:59)                                                                                                       |
|                                | <i>Forest:</i> Sounds of bird calls, an occasional buzzing bug, and gentle breeze rustling tree leaves (24:14)                                                                                    |

Participant training and intervention materials did not identify specific strategies as distraction, but explained that any of the strategies could provide a source of distraction and/or produce feelings of relaxation.
