# Supplementary material
Source: PubMed Central journal article supplement (PMC6279506)
Supplement: NIHMS987594-supplement-2.pdf [file NIHMS987594-supplement-2.pdf]

## **Intervention Fidelity Checklist:**

### **Patient-Controlled Cognitive-Behavioral Intervention Training**

#### **Component 1: Symptom Education**

1. Nurse Interventionist (NI) provides patient with information about pain during cancer treatment.
  - NI reviews definition of pain \_\_\_\_
  - NI reviews potential disease and treatment related causes of pain \_\_\_\_
2. NI provides patient with information about fatigue during cancer treatment.
  - NI reviews definition of fatigue \_\_\_\_
  - NI reviews potential disease and treatment related causes of fatigue \_\_\_\_
3. NI provides patient with information about sleep disturbance during cancer treatment.
  - NI reviews definition of sleep disturbance \_\_\_\_
  - NI reviews potential disease and treatment related causes of sleep disturbance \_\_\_\_
4. NI explains to patient how pain, fatigue, and sleep disturbance have been found to commonly co-occur \_\_\_\_
5. NI explains to patient how one of these three symptoms can influence the other symptoms \_\_\_\_
6. NI explains that these three symptoms are not just physical, but have emotional and psychological components as well \_\_\_\_
7. NI asks if patient has any questions \_\_\_\_

#### **Component 2: Rationale for Using CB Coping Strategies**

1. NI introduces the 3 types of CB coping strategies provided \_\_\_\_
2. NI describes to patient the rationale for using CB coping strategies in managing pain, fatigue, and sleep disturbance during cancer treatment \_\_\_\_

### **Component 3: Review of CB Coping Strategies Provided to Participants**

NI reviews specific CB coping strategies provided on the MP3 player.

1. NI reviews symptom-focused imagery (3 exercises) \_\_\_\_
2. NI reviews pleasant nature imagery (3 exercises) \_\_\_\_
3. NI reviews relaxation strategies (3 exercises) \_\_\_\_
4. NI reviews nature sound strategies (3 recordings) \_\_\_\_

### **Component 4: Treatment Plan**

1. NI uses chart provided in patient education book to review pain, fatigue, and sleep disturbance symptoms
  - NI writes down when symptoms typically occur / worsen \_\_\_\_
  - NI asks the patient to identify strategies that they think would be helpful for their symptoms and writes them down \_\_\_\_
  - NI and patient devise and write down a plan for using CB coping strategies \_\_\_\_
2. NI encourages patient to think about concerns and barriers that may prevent him/her from practicing the available CB coping strategies and NI provides possible solutions \_\_\_\_
3. NI reviews the list of hints for daily practice \_\_\_\_

### **Component 5: Explanation of MP3 Player Use:**

1. NI reviews written instructions for using the MP3 player found in the patient education booklet \_\_\_\_
2. NI reviews the MP3 player instruction card in the MP3 player case \_\_\_\_
3. NI demonstrates how to find a specific recording on the device
  - Turns on \_\_\_\_
  - Locates a recording \_\_\_\_
  - Presses play \_\_\_\_
  - Adjusts volume \_\_\_\_
  - Stops play \_\_\_\_
  - Turns off \_\_\_\_
  - Tells patient to charge the MP3 player by plugging it into the wall \_\_\_\_

4. NI asks patient to perform a return demonstration \_\_\_\_
5. NI encourages patient to use the MP3 player at least one time per day \_\_\_\_
6. NI asks if patient has any questions about the use of the MP3 player \_\_\_\_

**Component 6: Explanation of Weekly Symptom Diary**

1. NI reviews the weekly symptom diary with the participant \_\_\_\_
2. NI explains how to complete the weekly symptom diary, referencing the pre-filled out practice page example \_\_\_\_
3. NI asks patient if there is a particular time of day when he/she would be able to consistently complete the weekly symptom diary (suggests evening) \_\_\_\_
4. NI asks patient if they have any remaining questions about the intervention \_\_\_\_\_

## **Intervention Fidelity Checklist:**

### **Attention-Control (Cancer Education Recordings) Training**

#### **Importance of Cancer Education**

1. Nurse Interventionist (NI) explains the importance of understanding cancer and cancer treatment \_\_\_\_\_
2. NI asks if patient has any questions \_\_\_\_\_

#### **Review of Cancer Education Recordings Available**

1. NI reviews the 7 categories of cancer education recordings \_\_\_\_\_
2. NI reviews specific recordings provided on the MP3 player.
  - NI reviews *Cancer Basics* recordings \_\_\_\_\_
  - NI reviews *Exams and Test Descriptions* recordings \_\_\_\_\_
  - NI reviews *Types of Treatments* recordings \_\_\_\_\_
  - NI reviews *Managing Insurance and Financial Issues* recordings \_\_\_\_\_
  - NI reviews *Talking About Cancer* recordings \_\_\_\_\_
  - NI reviews *Coping with Cancer* recordings \_\_\_\_\_
  - NI reviews *Staying Well During and After Treatment* recordings \_\_\_\_\_

#### **Plan for Listening to Cancer Education Recordings**

1. NI asks patient to listen to at least one education recording per day \_\_\_\_\_
2. NI explains that participant may listen to the same recording more than once, if desired \_\_\_\_\_
3. NI reviews hints for daily use of cancer education recordings \_\_\_\_\_

### **Explanation of MP3 Player Use:**

1. NI reviews written instructions for using the MP3 player found in the guide booklet \_\_\_\_\_
2. NI reviews the MP3 player instruction card in the MP3 player case \_\_\_\_\_
3. NI demonstrates how to find a specific recording on the device
  - Turns on \_\_\_\_\_
  - Locates a recording \_\_\_\_\_
  - Presses play \_\_\_\_\_
  - Adjusts volume \_\_\_\_\_
  - Stops play \_\_\_\_\_
  - Turns off \_\_\_\_\_
  - Tells patient to charge the MP3 player by plugging it into the wall \_\_\_\_\_
4. NI asks patient to perform a return demonstration \_\_\_\_\_
5. NI asks if patient has any questions about the use of the MP3 player \_\_\_\_\_

### **Explanation of Weekly Symptom Diary**

1. NI reviews the weekly symptom diary with the participant \_\_\_\_\_
2. NI explains how to complete the weekly symptom diary, referencing the pre-filled out practice page example \_\_\_\_\_
3. NI asks patient if there is a particular time of day when he/she would be able to consistently complete the weekly symptom diary (suggests evening) \_\_\_\_\_
4. NI asks patient if they have any remaining questions \_\_\_\_\_

### **Discussion of Symptom Management**

1. NI does not provide any symptom management instructions \_\_\_\_\_
2. If the patient brings up symptom management, the NI refers the patient to his / her doctor or nurse \_\_\_\_\_
